# Supplementary material
Source: publisher figshare collection journal article supplement (https://rs.figshare.com/ndownloader/files/16838516)
Supplement: Supplementary file [file 16838516]

## Supplemental Document

**Table S4.** Post-hoc pair-wise comparisons for a reduced Kaua‘i ‘amakihi dataset that includes only 6 randomly chosen recordings from each time period. Post-hoc comparisons test for 1) differences in acoustic characteristics among time periods based on a PERMANOVA, and 2) variability in acoustic characteristics within time periods based on a PERMDISP.

| Comparison                 | Differences among<br>time periods | Variability within<br>time periods |
|----------------------------|-----------------------------------|------------------------------------|
| 1970s vs Early 2000s       | 0.84                              | 0.70                               |
| 1970s vs Present day       | <b>0.009</b>                      | <b>0.04</b>                        |
| Early 2000s vs Present day | 0.52                              | <b>0.008</b>                       |
